# Supplementary material
Source: PubMed Central journal article supplement (PMC9450212)

## A Microbiome metabolites in Portal Vein

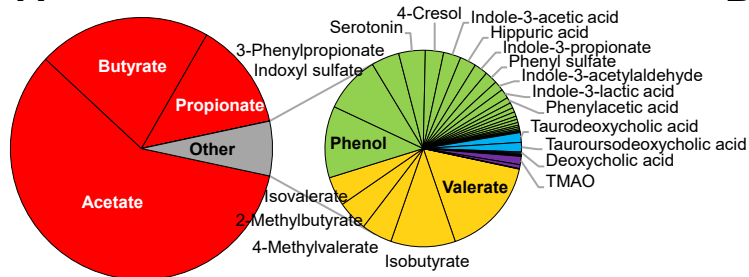

## B Microbiome metabolites in Cecal Content

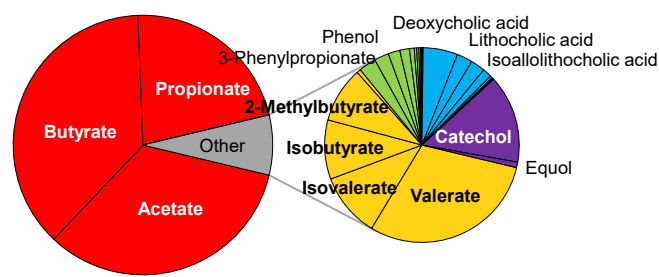

| Meal   | 13C-Source | Target Metabolite | Label       |
|--------|------------|-------------------|-------------|
| Meal 1 | 13C-Starch | Inulin            | Protein     |
| Meal 2 | Starch     | 13C-Inulin        | Protein     |
| Meal 3 | Starch     | Inulin            | 13C-AA      |
| Meal 4 | Starch     | Inulin            | 13C-protein |

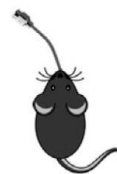

Portal blood, cecal content  
time course LC-MS

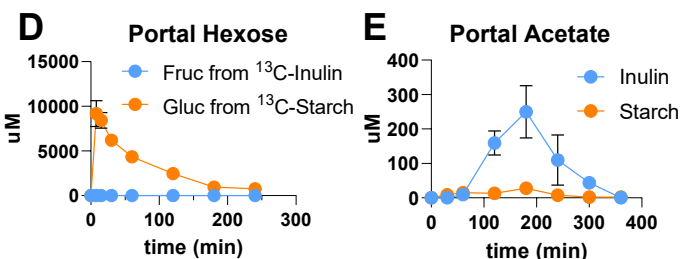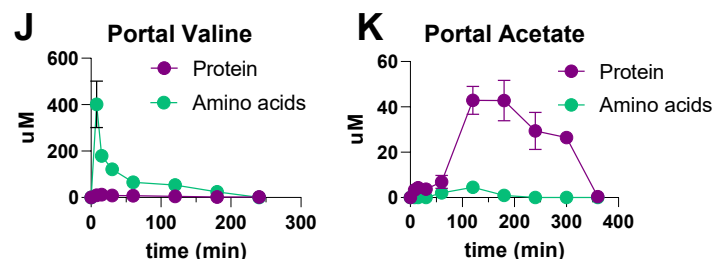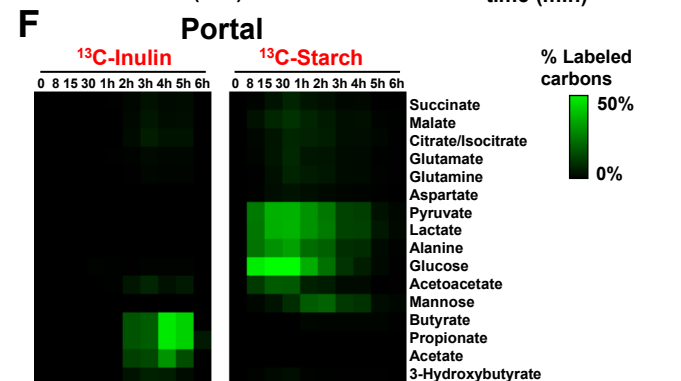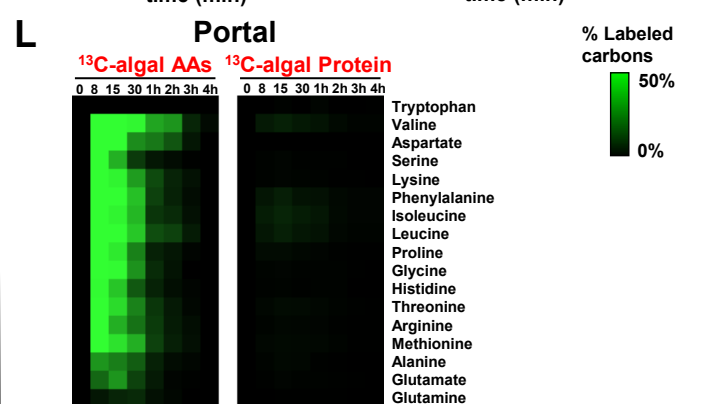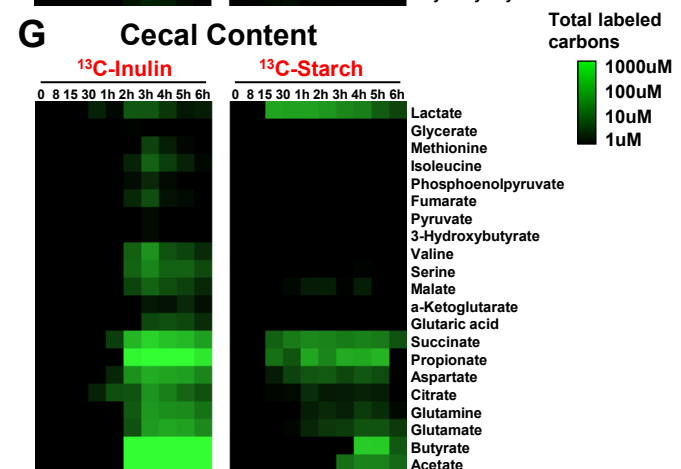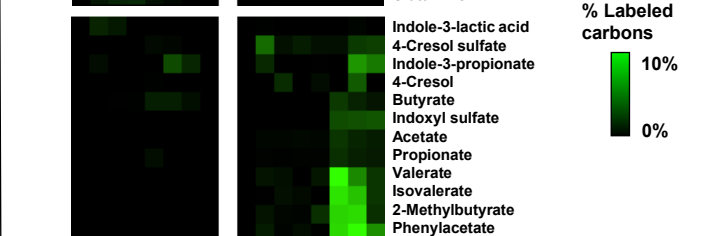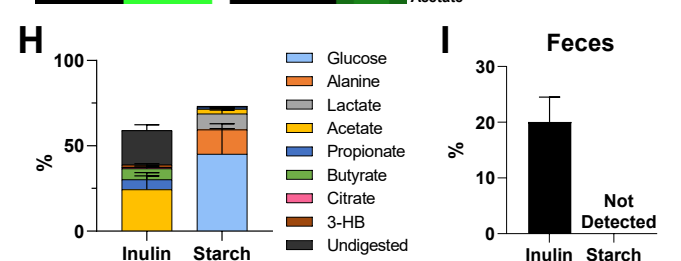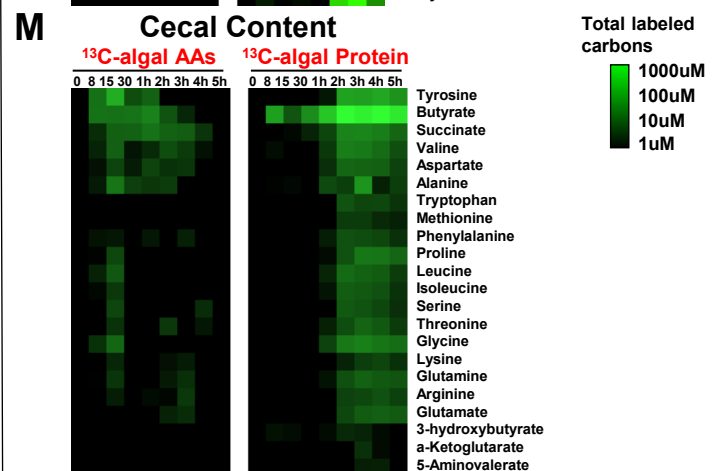

Supplement: NIHMS1828340-supplement-1.pdf [file NIHMS1828340-supplement-1.pdf]
