# Supplementary material
Source: PubMed Central journal article supplement (PMC9450212)

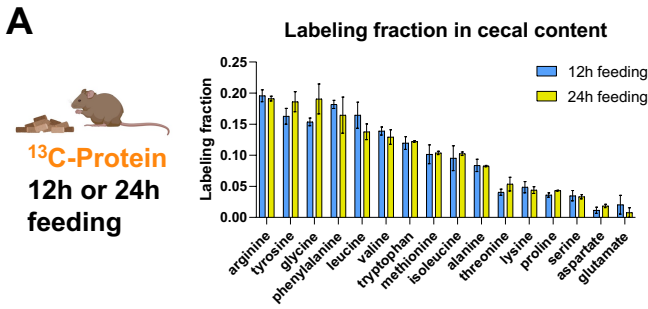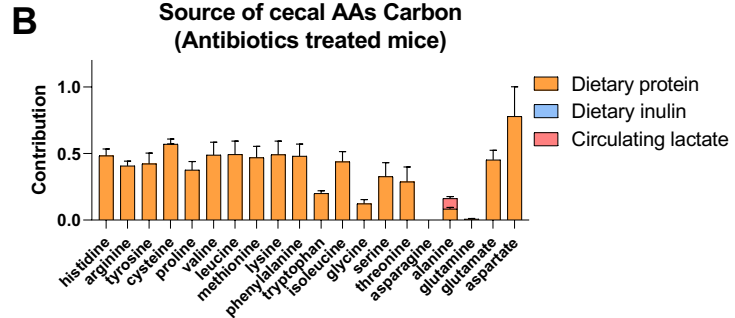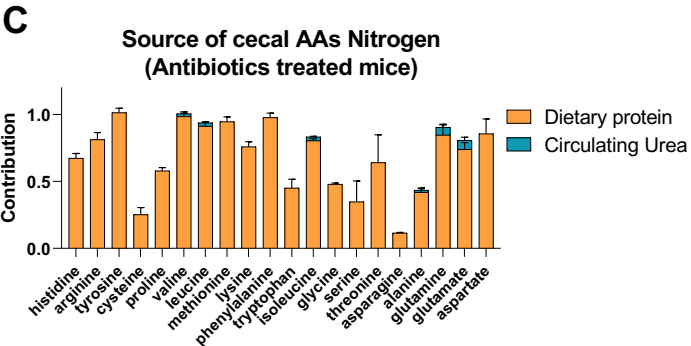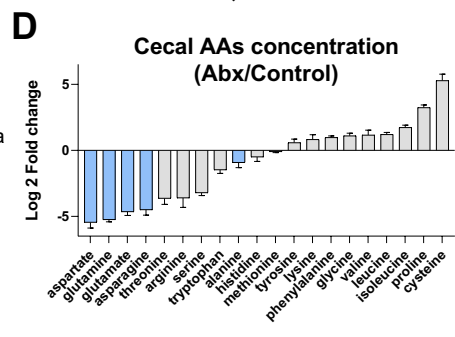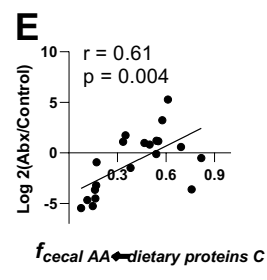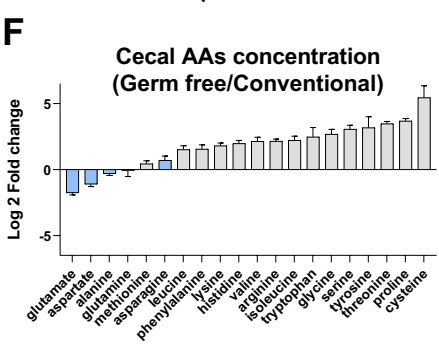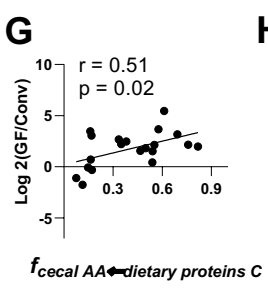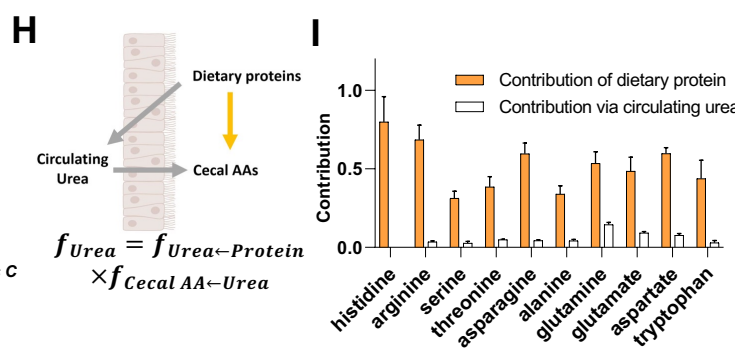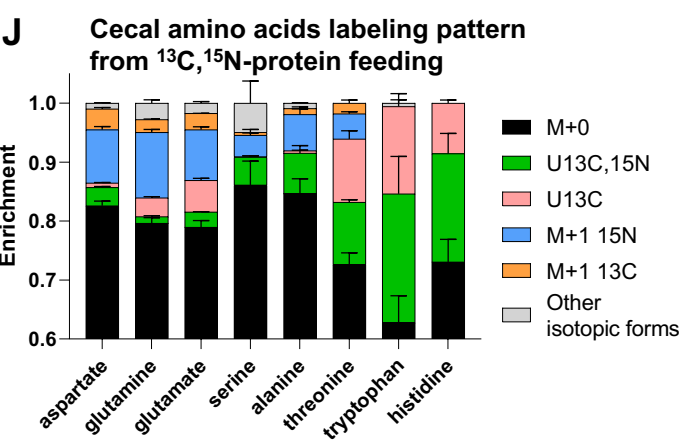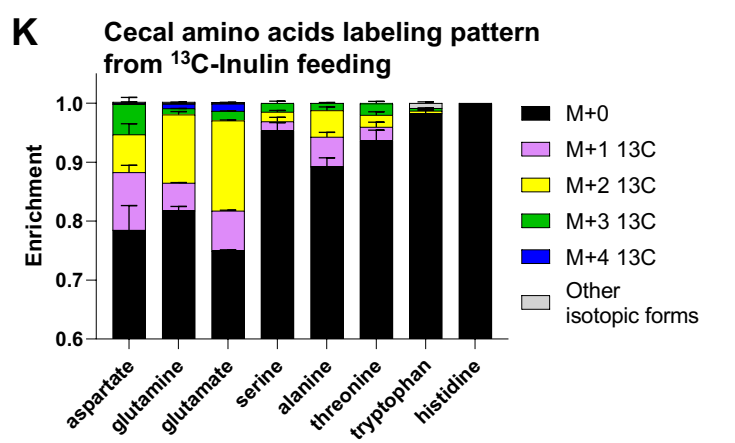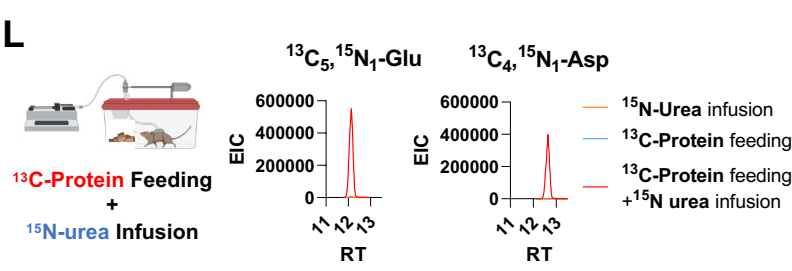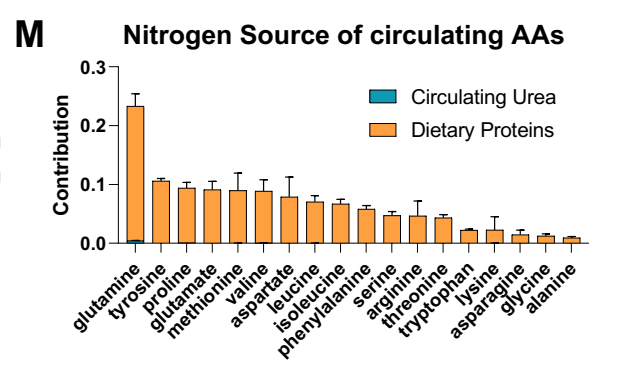

Supplement: NIHMS1828340-supplement-3.pdf [file NIHMS1828340-supplement-3.pdf]
